# Supplementary material
Source: PubMed Central journal article supplement (PMC1421356)
Supplement: JCI0626858sd.pdf [file JCI0626858sd.pdf]

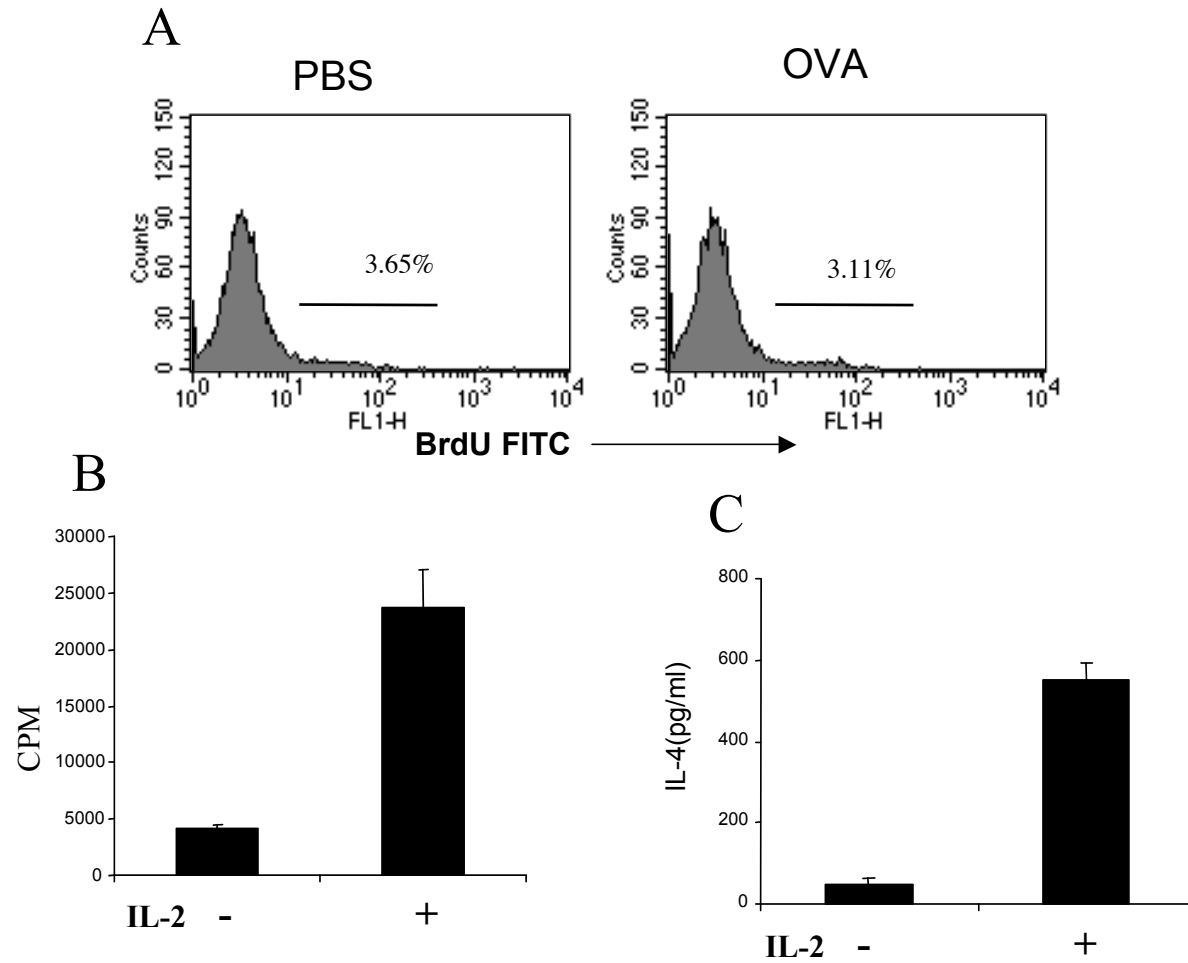

Figure S1

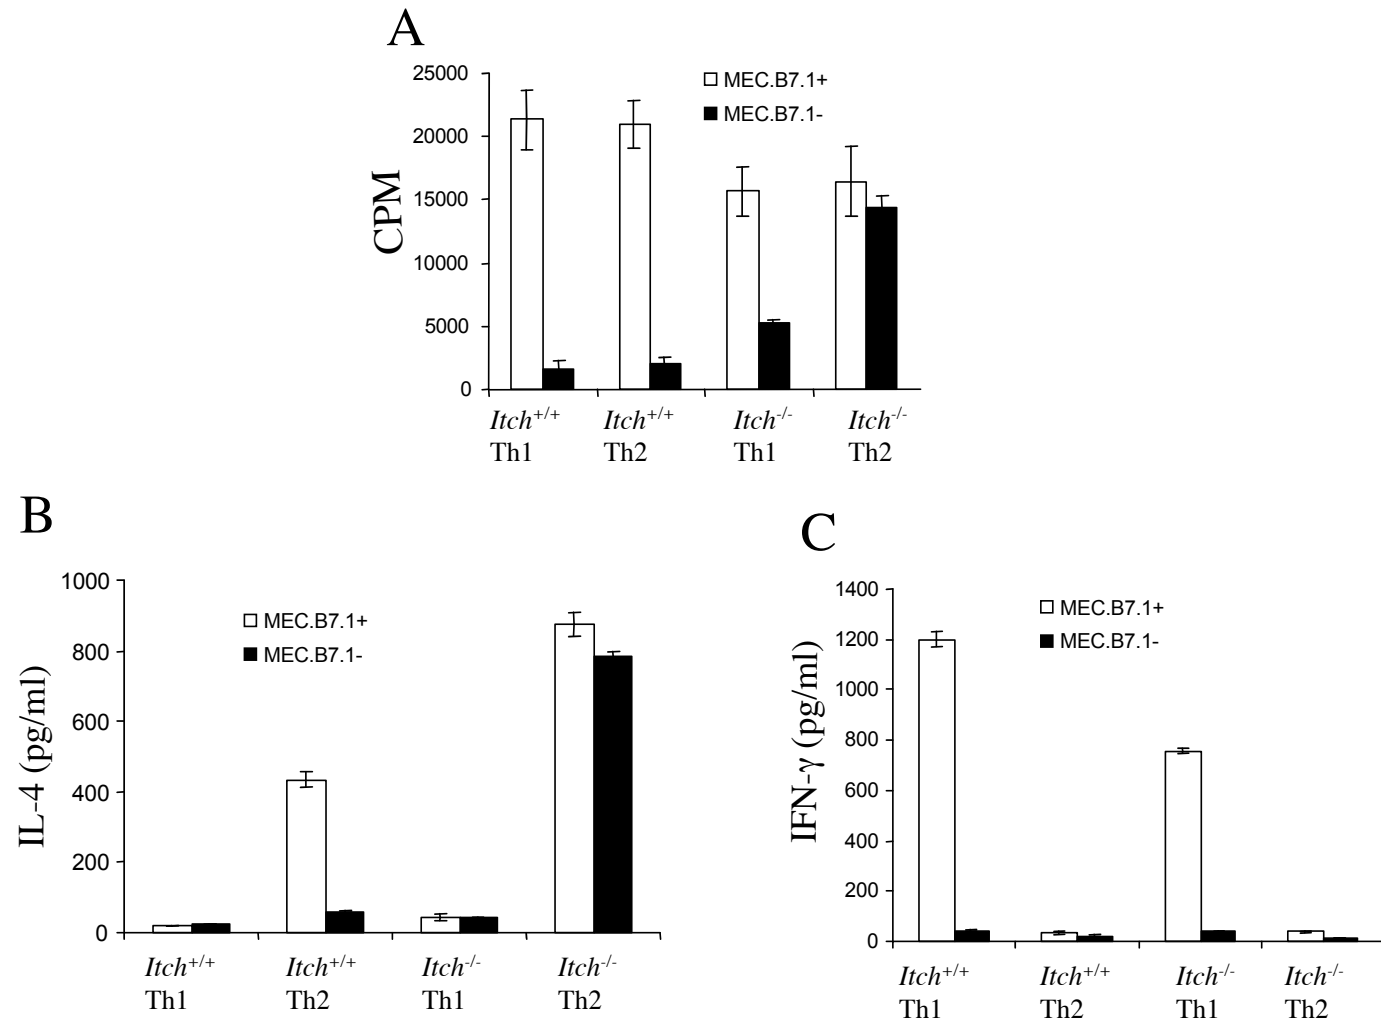

Figure S2

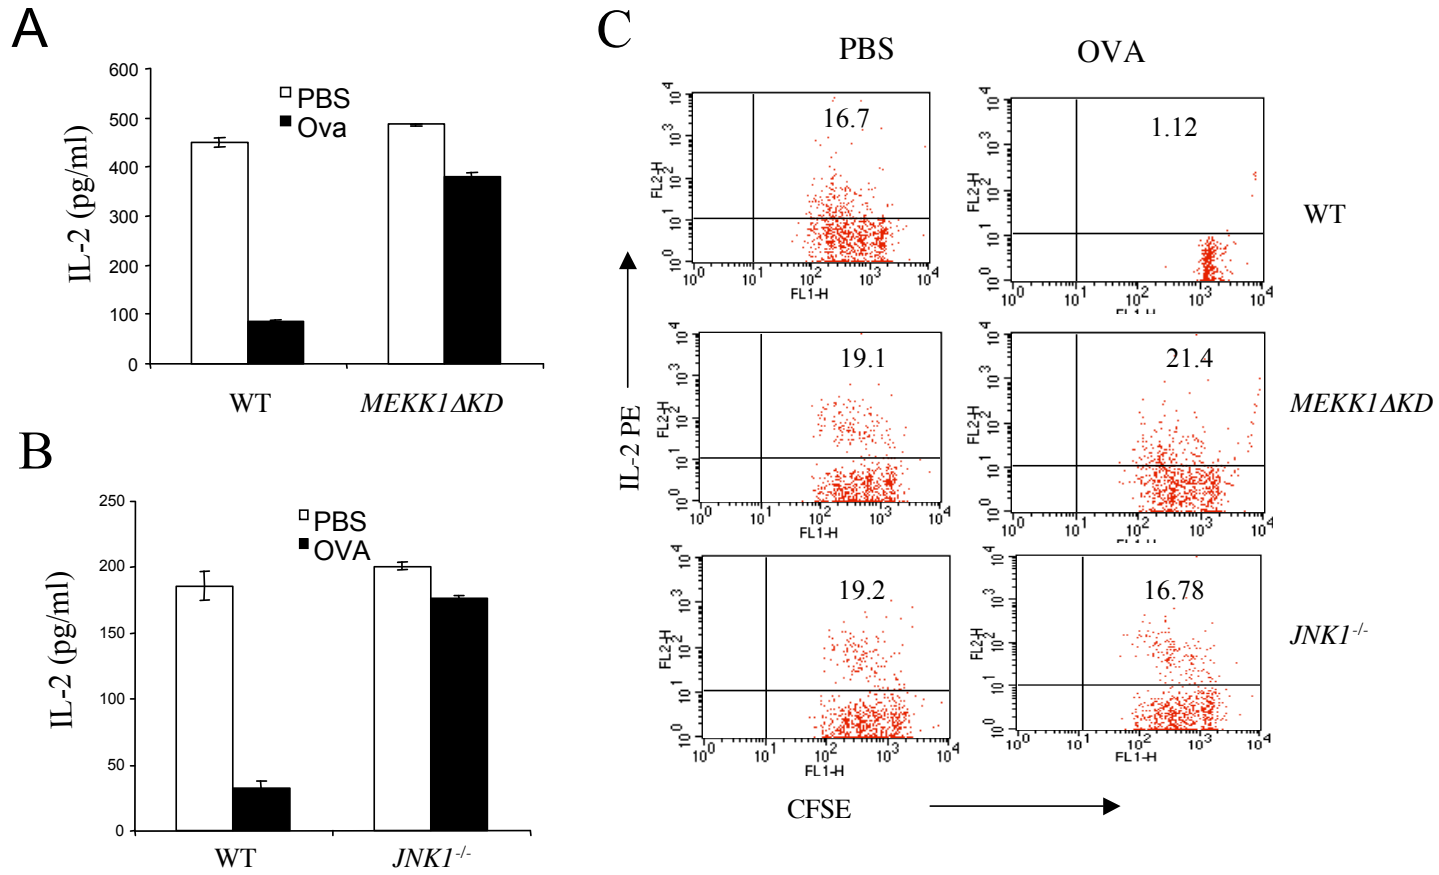

Figure S3

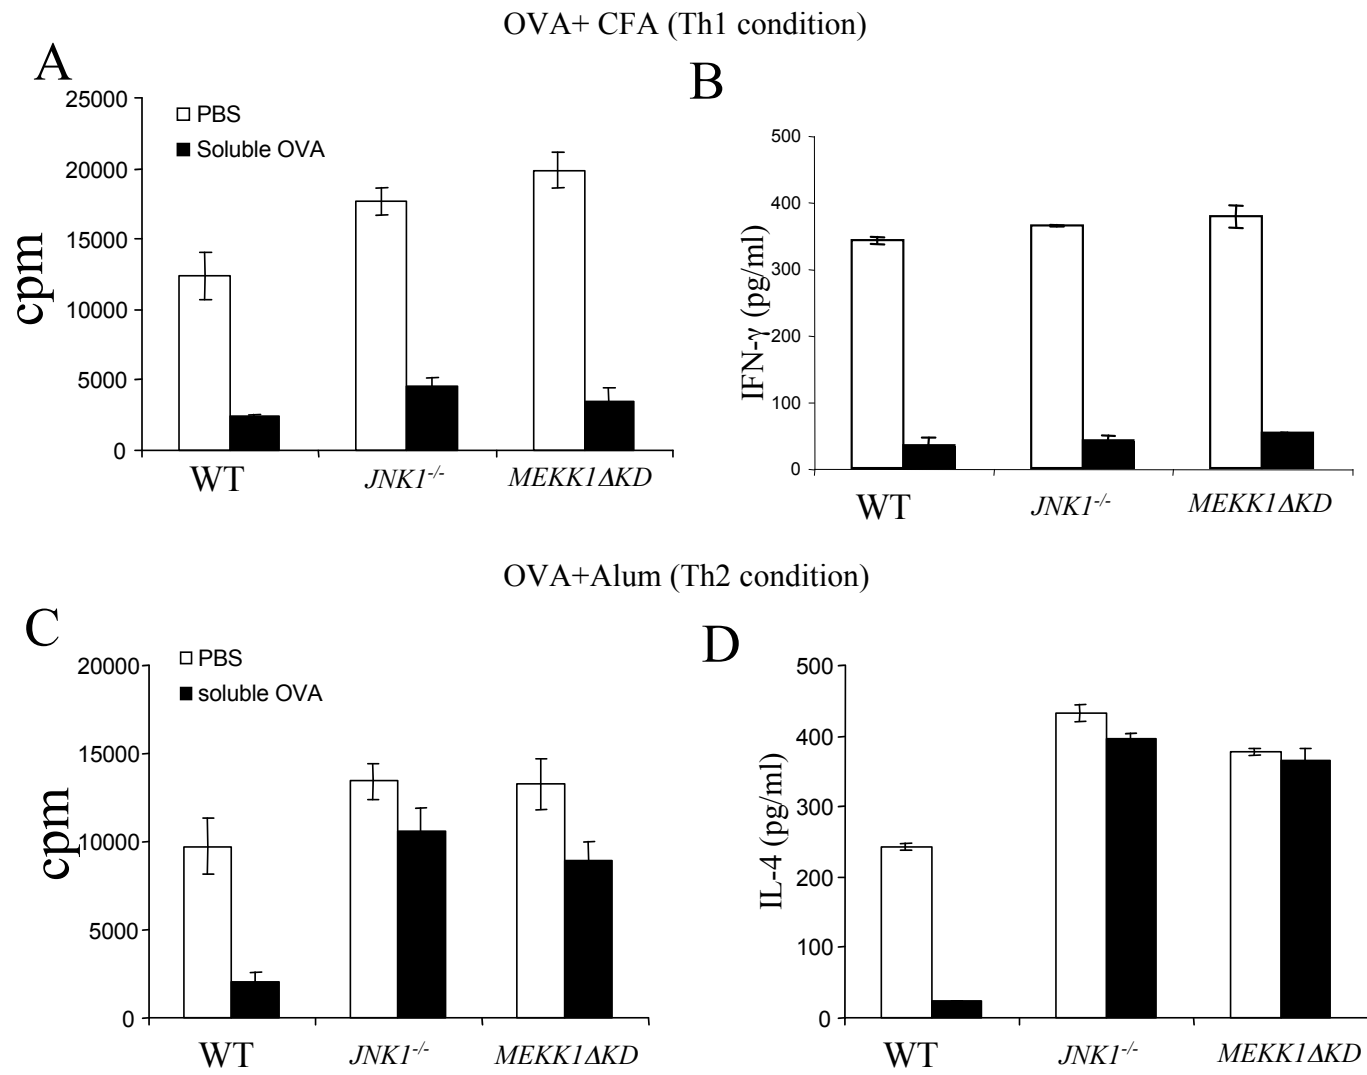

Figure S4

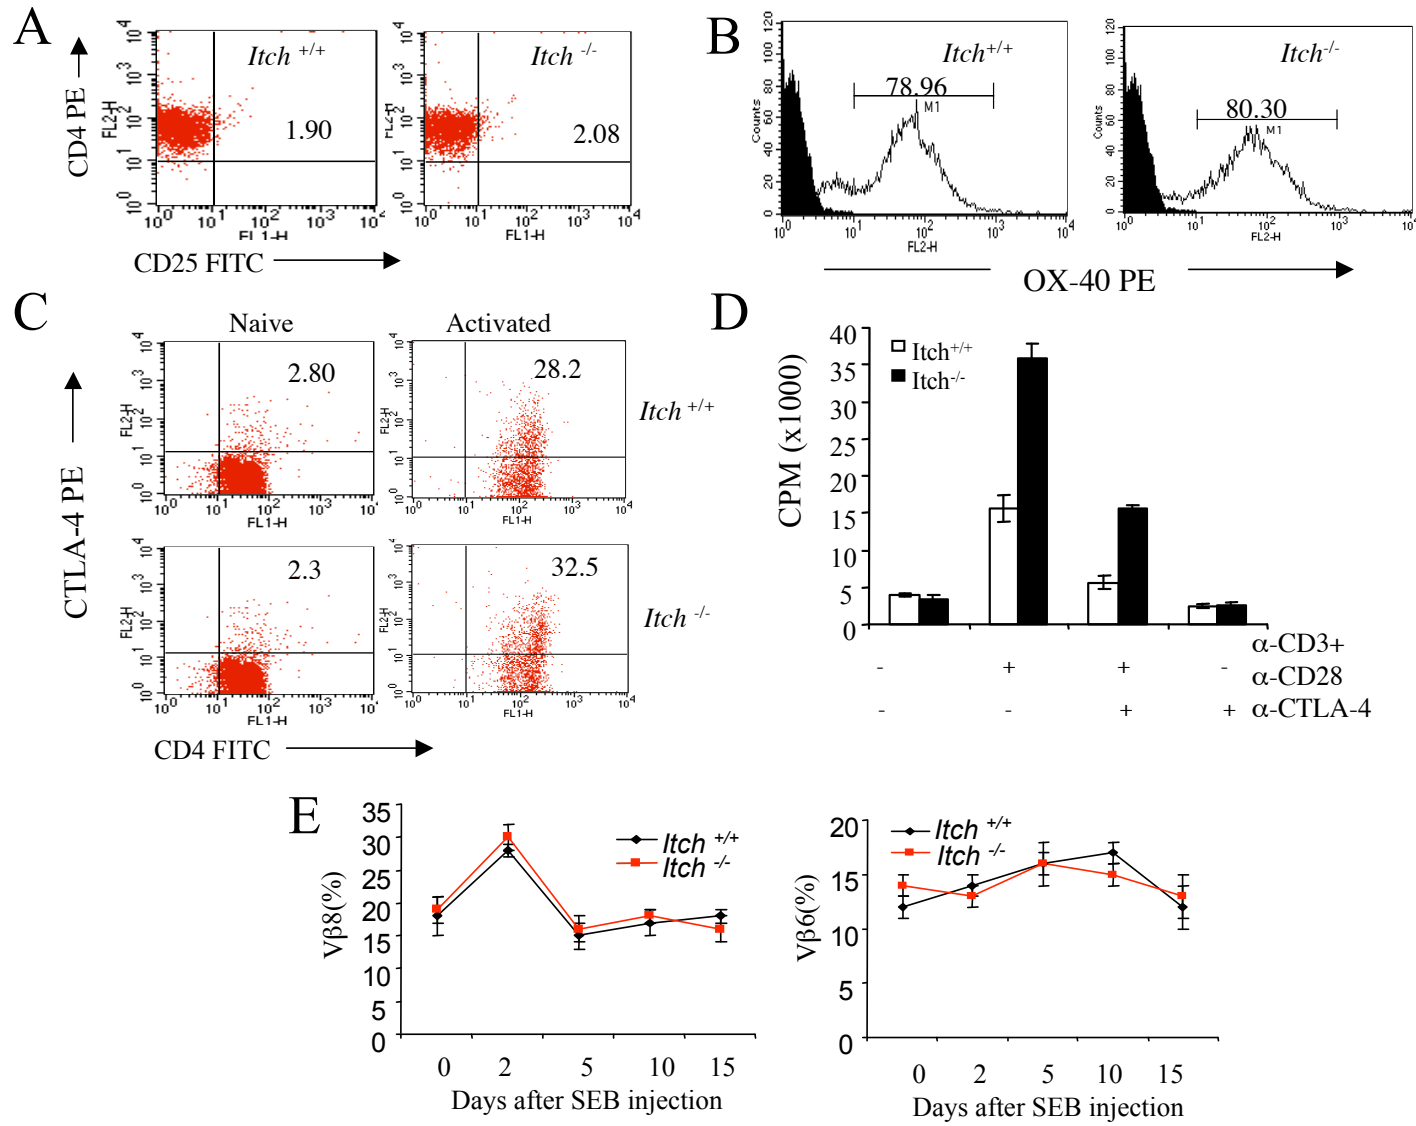

Figure S5

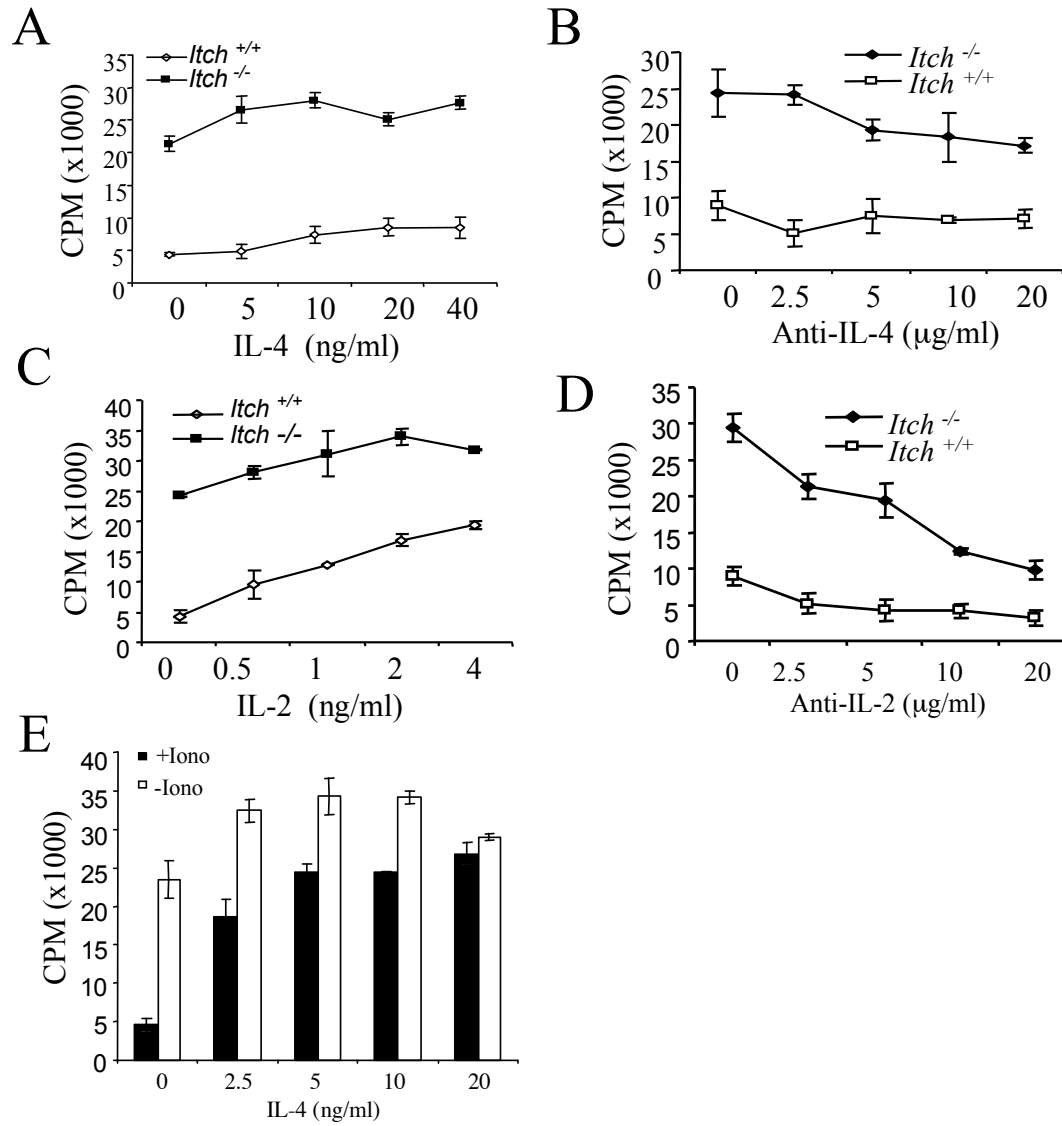

Figure S6

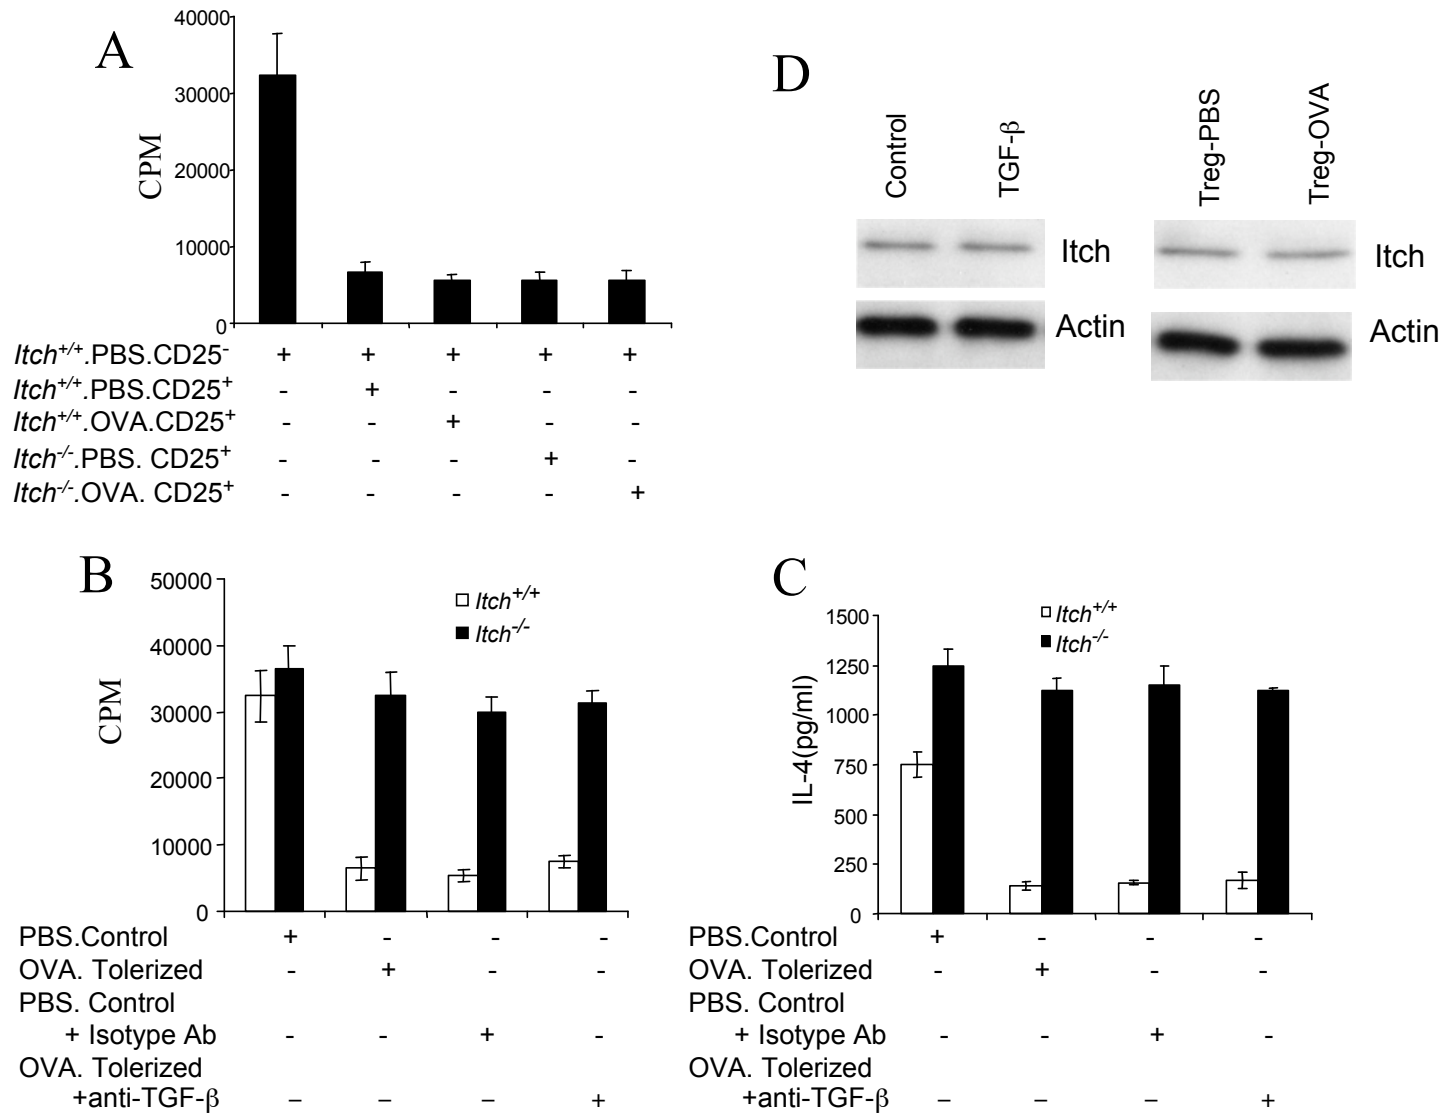

Figure S7

## Supplementary Figures

### Figure S1

Reversal of in vivo tolerized T cells by the addition of IL-2. **(A)** Soluble Ova injection does not induce cell death. Wild-type mice immunized with OVA+ Alum and simultaneously injected with high dose soluble OVA or PBS as control. On day 10 CD4<sup>+</sup> T cells were isolated and the cell survival was examined by using BrdU-FITC labeling. **(B and C)** OVA tolerized wild-type CD4<sup>+</sup> T cells from the above experiment were restimulated with OVA + irradiated APCs either with or without recombinant IL-2. The cell proliferation **(B)** and IL-4 production **(C)** were measured.

### Figure S2

T cell anergy induction by the absence of costimulation. **(A)** CD4<sup>+</sup> T cells from WT and *Itch*<sup>-/-</sup> OTII mice were differentiated into Th1 and Th2 cells. T cell tolerance was induced by culturing these cells with irradiated microvascular endothelial cells (MECs) in which B7.1 expression was stably expressed (MEC.B7.1+) or MEC control cells (MEC.B7.1-) in the presence of anti-CD3 (1 μg/ml) for 48 hr. The live cells were rested overnight and re-stimulated with anti-CD3 plus anti-CD28. Cell proliferation was measured by thymidine incorporation. **(B and C)** The culture supernatants collected after 48 hours were analyzed for IL-4 **(B)** and IFN-γ **(C)** secretion.

### Figure S3

Role of JNK1 signaling in Th2 tolerance in vivo. WT, *MEKK1ΔKD*, or *JNK1*<sup>-/-</sup> mice were tolerized with soluble OVA or treated with PBS as control, as described in Figure 5. The cytokine production of IL-2 **(A, B)** from in vitro re-stimulated cultures were measured. T cells from those mice were adoptively transferred and the IL-2 production



and CFSE dilution were determined by FACS analysis (**C**).

#### Figure S4

Loss of JNK1 signaling does not affect Th1 tolerance. Mice containing *MEKK1* mutation or *JNK1*<sup>-/-</sup> mice were treated with PBS or high dose OVA peptide, and immunized under either Th1 or Th2 inducing conditions, as described in Fig. 1. T cells were restimulated in vitro and the cell proliferation (**A** and **C**) and cytokine production (**B** and **D**) were analyzed.

#### Figure S5

Other tolerance-inducing mechanisms are Intact in *Itch*<sup>-/-</sup> mice. (**A**) CD4<sup>+</sup> T cells isolated from *Itch*<sup>+/+</sup> and *Itch*<sup>-/-</sup> mice were stained with anti-CD4-PE and anti-CD25-FITC and the percentage of CD4<sup>+</sup>CD25<sup>+</sup> Tregs was analyzed using flow cytometry. (**B**) CD4<sup>+</sup> T cells were stimulated with anti-CD3 (1 μg/ml) plus anti-CD28 (2 μg/ml) for 48 h and the cell surface expression of OX-40 was measured by staining the cells with PE-labeled anti-OX-40 antibody followed by flow cytometry. (**C**) CD4<sup>+</sup> T cells were stimulated with anti-CD3 plus anti-CD28 for 48 h and the surface expression of CTLA-4 was examined by staining the cells with PE-labeled anti-CTLA-4, followed by flow cytometry. (**D**) CD4<sup>+</sup> T cells (2X10<sup>5</sup>) were stimulated with anti-CD3 plus anti-CD28 for 48 h, rested for 6 h, and then restimulated with either anti-CD3 plus anti-CD28 in the presence or the absence of the immobilized anti-CTLA-4 antibody (5 μg/ml). The cell proliferation was measured by <sup>3</sup>H-thymidine incorporation. (**E**) Peripheral deletion of autoreactive T cells is intact in *Itch*<sup>-/-</sup> mice. SEB (100 μg) was injected intraperitoneally into either *Itch*<sup>+/+</sup> or *Itch*<sup>-/-</sup> mice. Peripheral blood was taken on indicated days from the tail vein and the cells were stained with Vβ8.1/2-FITC (left panel) or Vβ6-FITC (right panel) and anti-CD4-PE, followed by FACS analysis. The percentage of Vβ8- or Vβ6-positive cells was shown.

### Figure S6

Cytokine rescue of anergized Th2 cells. (A-D) Naïve CD4 T cells were first polarized into Th2 cells, and anergized by ionomycin pretreatment. The cells were then stimulated with anti-CD3 plus anti-CD28 in the presence of indicated concentrations of recombinant IL-4 (A), anti-IL-4 blocking antibody (B), recombinant IL-2 (C), or anti-IL-2 blocking antibody (D). Cells were cultured for 48 h, of which the last 12 h was pulsed with <sup>3</sup>H-thymidine. Thymidine incorporation was measured using scintillation counter. (E) Differentiated Th2 cells were cultured without or with ionomycin (50 ng/ml) in the presence of indicated concentrations of IL-4 for 16 h. The cells were then washed, stimulated with anti-CD3 plus anti-CD28, and measured for cell proliferation.

### Figure S7

Involvement of Tregs and TGF- $\beta$  in Itch-mediated T cell anergy induction. (A) Wild-type and Itch<sup>-/-</sup> mice were tolerized with high dose soluble OVA or PBS as control. On day 10, CD4<sup>+</sup>CD25<sup>+</sup> cells were isolated from those mice and were co-cultured CD4<sup>+</sup>CD25<sup>-</sup> responder T cells isolated from wild-type mice (ratio 1:1), and irradiated APC plus anti-CD3 (1  $\mu$ g/ml). The cell proliferation was measured by <sup>3</sup>H-thymidine incorporation. (B and C). Wild-type and Itch<sup>-/-</sup> mice were tolerized as described using high dose soluble OVA, and the CD4<sup>+</sup> T cells isolated on day 10 were stimulated in vitro with OVA peptide + irradiated APCs. Either anti-TGF- $\beta$  or isotype matched control antibody was added to the cultures. The cell proliferation was examined by <sup>3</sup>H-thymidine incorporation (B) and the IL-4 concentration in the supernatants was measured by using ELISA. (D) Itch expression in responder T cells is not modulated by Tregs or TGF- $\beta$ . CD4<sup>+</sup>CD25<sup>-</sup> responder cells from wild-type OT-II mice were left untreated or stimulated with TGF- $\beta$  (2.5 ng/ml, left panel) or co-cultured with Tregs from either PBS-treated or

soluble OVA-tolerized mice in the presence of APCs plus OVA peptide (right panel). Twelve hr later, Itch expression was examined by immunoblotting with anti-Itch antibody. The same membrane was reprobed with anti-Actin as a control for equivalent protein loading.
